# Supplementary material for: The Spleen as a Target to Characterize Immunomodulatory Effects of Down-Stream Processed Cyberlindnera jadinii Yeasts in Atlantic Salmon Exposed to a Dietary Soybean Meal Challenge
Source: Front Immunol. 2021 Aug 20;12:708747. doi: 10.3389/fimmu.2021.708747 (PMC8417602; doi:10.3389/fimmu.2021.708747)
Supplement: Supplementary file 2 [file DataSheet_2.xlsx]

## Sheet: FM | SBM
Id	Description
106569119	von Willebrand factor C domain-containing protein 2-like		Upregulated
100136572	hba; hemoglobin subunit alpha		Downregulated
106569843	BOLA class I histocompatibility antigen, alpha chain BL3-7-like
106577511	apolipoprotein C-I-like
106560623	angiomotin-like 2a
106563235	zinc finger protein Gfi-1b-like
106577506	apolipoprotein Eb-like
106562888	neutral amino acid transporter A-like
106585833	H1; histone H1-like
106591653	uncharacterized LOC106591653
106604036	B-cell receptor CD22-like
106579861	slc25a37; solute carrier family 25 member 37
106597167	transferrin receptor protein 1-like
106607112	HBB1; hemoglobin subunit beta-1
106562007	BNIP3; BCL2/adenovirus E1B 19 kDa protein-interacting protein 3-like
106589620	Krueppel-like factor 1
106602627	spectrin beta chain, erythrocytic-like
106592009	Fc receptor-like protein 5
106590880	microsomal glutathione S-transferase 1-like
100380859	b3at; band 3 anion exchange protein
100196543	s29a1; equilibrative nucleoside transporter 1
106563020	TNF receptor-associated factor 2-like
106579182	heparan sulfate glucosamine 3-O-sulfotransferase 2-like
106606856	band 3 anion exchange protein-like
106607180	serine/threonine-protein kinase WNK4-like
106577368	slc1a4; solute carrier family 1 member 4
106604951	histone-lysine N-methyltransferase 2D-like
106572189	ferrochelatase, mitochondrial-like
106606079	protein 4.1-like
106594548	uncharacterized LOC106594548
106606869	band 3 anion exchange protein-like
106564529	zinc finger protein 120-like
106580750	rhbg; Rh family B glycoprotein
106586175	catalase-like
106580774	tubulin-specific chaperone cofactor E-like protein
106603725	protein FAM57B-like
106602870	HEM3; porphobilinogen deaminase-like
106565557	F264; 6-phosphofructo-2-kinase/fructose-2,6-bisphosphatase 4-like
106606485	CP014; protein FAM195A-like
106580341	ankyrin-1-like
100306838	addb; Beta-adducin
106609325	mitochondrial 10-formyltetrahydrofolate dehydrogenase-like
106570377	Na(+)/H(+) exchanger beta
100286563	nnmt; Nicotinamide N-methyltransferase
106589641	wnk4; WNK lysine deficient protein kinase 4
106604897	uncharacterized LOC106604897
106613611	mitotic interactor and substrate of PLK1-like
106568959	small conductance calcium-activated potassium channel protein 2-like
106564374	uncharacterized LOC106564374
106601717	Ig mu chain C region membrane-bound form-like
106575220	uncharacterized LOC106575220
106601073	hemoglobin subunit beta-1-like
106601824	PRVU; parvalbumin, thymic CPV3-like
100195195	s20aa; Sodium-dependent phosphate transporter 1-A
100195543	e2ak1; eukaryotic translation initiation factor 2-alpha kinase 1
106580352	MTDC; bifunctional methylenetetrahydrofolate dehydrogenase/cyclohydrolase, mitochondrial-like
106609055	ras-related protein Rab-38-like
106569088	sodium- and chloride-dependent glycine transporter 1-like
106601071	HBA4; hemoglobin subunit alpha-4
106564305	lipopolysaccharide-induced tumor necrosis factor-alpha factor homolog
106583316	sodium/potassium-transporting ATPase subunit alpha-3-like
106601076	HBA4; hemoglobin subunit alpha-4
106561364	Krueppel-like factor 4
106589687	zbtb18; zinc finger and BTB domain containing 18
106566122	protein FAM210A-like
100499263	selja; selenoprotein Ja
106564350	uncharacterized LOC106564350
106563000	2-oxoglutarate dehydrogenase, mitochondrial-like
106607373	HBA; hemoglobin subunit alpha-like
106564359	myopalladin-like
106583558	sodium- and chloride-dependent GABA transporter 2-like
106590143	phosphatidate phosphatase LPIN2-like
106607372	HBB; hemoglobin subunit beta-like
106603197	vesicle-associated membrane protein 2
106587137	G1/S-specific cyclin-D1
106590842	ephexin-1-like
106607375	HBA4; hemoglobin subunit alpha-4
106611774	alpha-1,3-mannosyl-glycoprotein 4-beta-N-acetylglucosaminyltransferase B-like
106580320	sodium- and chloride-dependent GABA transporter ine-like
106589295	neuronal-specific septin-3-like
100136438	RhAG-like protein
100195425	adb4c; Beta-4C adrenergic receptor
106566425	Plagl2; zinc finger protein PLAGL2-like
106607371	hemoglobin subunit beta-1-like
106601078	HBA; hemoglobin subunit alpha-like
106602863	ATP-binding cassette sub-family G member 4-like
100380525	frrs1; ferric-chelate reductase 1
100194738	gata1; GATA-binding factor 1
106573055	AMPM2; methionine aminopeptidase 2-like
106612116	psd2; pleckstrin and Sec7 domain containing 2
106601354	uncharacterized LOC106601354
106575454	WW domain-binding protein 4-like
106589462	narf; nuclear prelamin A recognition factor
106575499	sodium/myo-inositol cotransporter-like
100136576	hbb; beta globin
106592210	WW domain-binding protein 4-like
106584453	transcriptional enhancer factor TEF-3-like
106611817	protein HID1-like
106600508	rho guanine nucleotide exchange factor 18-like
106593625	transmembrane protein 26-like
106565457	zinc finger protein Gfi-1b-like
106582882	GATA-binding factor 2-like
106561060	transcription factor SOX-6-like
106564824	CATA; catalase-like
100196184	cish; cytokine inducible SH2 containing protein
106587020	dmtn; dematin actin binding protein
106569142	2-oxoglutarate dehydrogenase, mitochondrial-like
106560701	prr5l; proline rich 5 like
106587409	lysozyme g-like
106612608	prss16; protease, serine 16
100196749	if2b; Eukaryotic translation initiation factor 2 subunit 2
106602744	tripartite motif-containing protein 2
106569126	zinc finger protein SNAI2-like
106585259	ankyrin-1-like
106572153	alas2; 5'-aminolevulinate synthase 2
106580524	tumor necrosis factor receptor superfamily member 10B-like
106605015	vascular endothelial growth factor A-A-like
100286657	tssp; Thymus-specific serine protease
106565041	fam65c; family with sequence similarity 65 member C
106566109	tubulin beta-6 chain-like
106575861	kell blood group glycoprotein-like
106579160	probable phosphatase phospho1
100195135	dema; Dematin
100195152	tal1; T-cell acute lymphocytic leukemia 1
106581541	high affinity cationic amino acid transporter 1-like
106566560	tp53inp2; tumor protein p53 inducible nuclear protein 2
106583420	uncharacterized LOC106583420
106561684	methionine aminopeptidase 2-like
100196674	pk; pyruvate kinase
106576756	transmembrane protein 229B-like
106607383	HBA; hemoglobin subunit alpha-like
106579276	pdzd7; PDZ domain containing 7
100195268	cahz; carbonic anhydrase
106577069	phytanoyl-CoA hydroxylase-interacting protein-like
106571195	ammonium transporter Rh type A-like
106578213	FH2 domain-containing protein 1-like
106602333	hemogen-like
106590488	apolipoprotein O-like
100194908	ub2r2; Ubiquitin-conjugating enzyme E2 R2
106580346	METK2; S-adenosylmethionine synthase isoform type-2-like
106596109	protein 4.1-like
106572953	myoD family inhibitor domain-containing protein-like
106567988	protein FAM222B-like
106612499	transcription factor E2F2-like
106584620	transcription factor SOX-6-like
106567164	rap guanine nucleotide exchange factor 3-like
106579879	BCL2/adenovirus E1B 19 kDa protein-interacting protein 3-like
106572882	thymic stromal cotransporter homolog
106586681	xk; X-linked Kx blood group
100196390	saca4; Sperm acrosome membrane-associated protein 4
106582917	uncharacterized LOC106582917
106601234	uncharacterized LOC106601234
106600856	deleted in malignant brain tumors 1 protein-like
100195691	hbad; Hemoglobin subunit alpha-D
106590175	max-interacting protein 1-like
106582916	RB24B; RNA-binding protein 38-like
106612328	golgin subfamily A member 6-like protein 22
106590999	oxysterol-binding protein-related protein 10-like
106610370	CDN2B; cyclin-dependent kinase 4 inhibitor B-like
106597540	Ig mu chain C region membrane-bound form-like
106592852	uncharacterized LOC106592852
106597201	trichohyalin-like
106573646	SNF-related serine/threonine-protein kinase-like
100194631	ckm2; creatine kinase-2
106580739	blvrb; biliverdin reductase B
100380571	npdc1; neural proliferation, differentiation and control, 1
106587037	nudt12; nudix hydrolase 12
100195209	sia7f; Alpha-N-acetylgalactosaminide alpha-2,6-sialyltransferase 6
106571903	platelet glycoprotein IX-like
100194509	tmod4; tropomodulin 4 (muscle)
106573718	cpne2; copine 2
106602957	cationic amino acid transporter 3-like
106566239	adhesion G protein-coupled receptor E1-like
106579682	solute carrier family 12 member 7-like
106566120	shmt2; serine hydroxymethyltransferase 2
106592905	lysophosphatidic acid receptor 2-like
106579829	ggt2; gamma-glutamyltransferase 2
100306867	cb055; CB055 protein
106592377	carboxypeptidase E
106568452	trimeric intracellular cation channel type B-like
106589520	cerebellar degeneration-related protein 2-like
106577862	amyloid-like protein 1
106612419	endothelin-converting enzyme 2-like
106572584	transcription factor NF-E2 45 kDa subunit-like
106563688	hypoxia-inducible factor 1-alpha-like
106601558	solute carrier family 25 member 39-like
106605617	amyloid-like protein 1
106613077	nlk; nemo like kinase
106593275	RL18A; 60S ribosomal protein L18a-like
106560515	TPOR; thrombopoietin receptor-like
106611720	four and a half LIM domains protein 1-like
106570475	protein argonaute-2
100380459	tmem43; transmembrane protein 43
106612460	sik2; salt inducible kinase 2
100286544	nmes1; Normal mucosa of esophagus-specific gene 1 protein
106601364	ras-related protein Rab-3D-like
106574609	probable phospholipid-transporting ATPase IH
106579950	myotubularin-related protein 3-like
106603355	uncharacterized LOC106603355
106592550	CD97 antigen-like
106571215	NACHT, LRR and PYD domains-containing protein 12-like
106613409	E3 ubiquitin-protein ligase HERC2-like
106607157	uncharacterized LOC106607157
106593475	axoneme-associated protein mst101(2)-like
106588768	sestrin-1-like
106584164	zinc finger protein Gfi-1-like
106578515	coiled-coil domain-containing protein 129-like
106595184	trichohyalin-like
100286559	prr5; proline-rich protein 5
106565686	fam78a; family with sequence similarity 78 member A
106578138	RNA polymerase II degradation factor 1-like
106590038	T-cell acute lymphocytic leukemia protein 1 homolog
106568712	ADP-dependent glucokinase-like
100195306	chac1; ChaC, cation transport regulator-like 1
106589688	adenylosuccinate synthetase isozyme 2-like
106594502	zinc finger protein 850-like
106564567	prdx1; peroxiredoxin-1-like
106577592	protein AF-9-like
106566776	HYAL2; hyaluronidase-3-like
106574405	ras-related protein Rab-9A-like
106579933	gamma-glutamyltranspeptidase 1-like
100195794	prdx1; peroxiredoxin 1
106613235	F-BAR and double SH3 domains protein 2-like
106605689	apolipoprotein Eb-like
106603023	matrin-3-like
106591895	leucine-rich repeat-containing protein 32-like
106578744	lysosomal-trafficking regulator-like
100196663	adenosine kinase a
106590275	max-interacting protein 1-like
106582002	papilin-like
100380360	f13a; Coagulation factor XIII A chain
106568620	asap1; ArfGAP with SH3 domain, ankyrin repeat and PH domain 1
106593320	NACHT, LRR and PYD domains-containing protein 12-like
106560707	carnitine O-palmitoyltransferase 1, liver isoform-like
100196450	haao; 3-hydroxyanthranilate 3,4-dioxygenase
106580917	tropomodulin-4-like
106567066	transcription factor NF-E2 45 kDa subunit-like
100195174	snai2; snail family transcriptional repressor 2
106612809	uncharacterized LOC106612809
106572826	plagl2; PLAG1 like zinc finger 2
106605403	uncharacterized LOC106605403
106582237	GBP1; interferon-induced guanylate-binding protein 1-like
106565069	ccndbp1; cyclin D1 binding protein 1
106573173	homeodomain-interacting protein kinase 2-like
100136511	CCL4-like chemokine
106593355	B-cell lymphoma/leukemia 11A-like
106567727	zinc finger and BTB domain-containing protein 16-A-like
106561807	integrin alpha-2-like
106578876	WW domain-binding protein 2-like
106582666	DNA damage-inducible transcript 3 protein-like
106606537	Na(+)/H(+) exchange regulatory cofactor NHE-RF2-like
106576735	nuclear receptor coactivator 4-like
106592986	immunoglobulin lambda-like polypeptide 1
106563636	mrps18c; mitochondrial ribosomal protein S18C
106570960	psat1; phosphoserine aminotransferase 1
106586711	NACHT, LRR and PYD domains-containing protein 12-like
106607929	kcnk2; potassium two pore domain channel subfamily K member 2
106604870	cytoplasmic polyadenylation element-binding protein 3-like
106579798	potassium channel subfamily T member 1-like
106579149	integrin beta-3-like
106600877	integrin alpha-IIb-like
106572092	inositol 1,4,5-trisphosphate receptor type 3-like
106560885	zfpm1; zinc finger protein, FOG family member 1
100194825	s2540; Solute carrier family 25 member 40
106571123	IF5; eukaryotic translation initiation factor 5-like
106592291	uncharacterized LOC106592291
106613459	uncharacterized LOC106613459
100380861	zran1; ubiquitin thioesterase Zranb1
106580625	ATP-binding cassette sub-family A member 2-like
100195692	pde4d; cAMP-specific 3,5-cyclic phosphodiesterase 4D
106605377	neural-cadherin-like
100306799	srpk3; Serine/threonine-protein kinase SRPK3
106571138	protein phosphatase 1 regulatory subunit 14B-like
106580280	SET-binding protein-like
106586194	cordon-bleu protein-like 1
106560450	cyr61; cysteine rich angiogenic inducer 61
106605036	fasciculation and elongation protein zeta-2-like
106580474	platelet glycoprotein Ib beta chain-like
100195610	plek; pleckstrin
106585516	E3 ubiquitin-protein ligase DTX1-like
106590231	sporozoite surface protein 2-like
106603870	cytoplasmic polyadenylation element-binding protein 4-like
106580611	neural-cadherin-like
106613552	SUN domain-containing protein 2-like
100380649	tsc1; hamartin
106588904	protein lifeguard 1-like
100306815	ube2h; ubiquitin-conjugating enzyme E2H (UBC8 homolog, yeast)
106576890	C-Jun-amino-terminal kinase-interacting protein 4-like
106571946	adenylate cyclase type 6-like
106565428	natural resistance-associated macrophage protein 2-like
106570315	adseverin-like
106583928	protein cramped-like
106578077	uncharacterized LOC106578077
106574198	bcl-2-related ovarian killer protein homolog A
106604905	zinc finger protein 518A-like
106585557	BCL2/adenovirus E1B 19 kDa protein-interacting protein 3-like
106577109	acoxl; acyl-CoA oxidase-like
106606699	GLO2; hydroxyacylglutathione hydrolase, mitochondrial
106582153	sentrin-specific protease 7-like
106576577	herc1; HECT and RLD domain containing E3 ubiquitin protein ligase family member 1
106586651	nuclear receptor subfamily 1 group I member 2-like
100195574	sfxn2; sideroflexin 2
106577800	tripartite motif-containing protein 34A-like
106608991	CAN1; calpain-1 catalytic subunit-like
106571314	monocarboxylate transporter 10-like
106606136	src-like-adapter
106613633	cAMP-specific 3',5'-cyclic phosphodiesterase 4D-like
106610305	calcium uniporter protein, mitochondrial-like
106598552	b3galt2; beta-1,3-galactosyltransferase 2
100306852	ccnd1; cyclin D1
100195594	grl1; Gamma-aminobutyric acid receptor-associated protein-like 1
100380551	ifrd2; interferon related developmental regulator 2
106574185	b3gnt7; UDP-GlcNAc:betaGal beta-1,3-N-acetylglucosaminyltransferase 7
106563116	breakpoint cluster region protein-like
100195141	asns; asparagine synthetase
106599585	chromodomain-helicase-DNA-binding protein 7-like
106581948	ral guanine nucleotide dissociation stimulator-like 2
106599084	T-cell acute lymphocytic leukemia protein 1-like
106604432	uncharacterized LOC106604432
106590324	T-cell acute lymphocytic leukemia protein 1-like
106581262	uncharacterized LOC106581262
106610888	bsdc1; BSD domain containing 1
106605278	ral guanine nucleotide dissociation stimulator-like 2
106585047	platelet glycoprotein Ib beta chain-like
106586691	cystathionine beta-synthase-like
106567312	IQ motif and SEC7 domain-containing protein 2-like
106590971	mtr; 5-methyltetrahydrofolate-homocysteine methyltransferase
106589602	wipi1; WD repeat domain, phosphoinositide interacting 1
100194970	ctgf; connective tissue growth factor
106613416	E3 ubiquitin-protein ligase HERC2-like
106578163	tec; tec protein tyrosine kinase
106568947	cAMP-specific 3',5'-cyclic phosphodiesterase 4D-like
106582844	band 4.1-like protein 1
100380793	ctbp2; C-terminal binding protein 2
106611750	uncharacterized LOC106611750
106586781	alpha-1,3-mannosyl-glycoprotein 4-beta-N-acetylglucosaminyltransferase A-like
106571305	ribonuclease ZC3H12A-like
106567133	45 kDa calcium-binding protein-like
106592132	trinucleotide repeat-containing gene 6A protein-like
106613996	sphingosine 1-phosphate receptor 4-like
106570297	asparagine synthetase [glutamine-hydrolyzing]-like
106580165	ARRD3; arrestin domain-containing protein 3
106584104	protein furry homolog-like
106575215	glutaminase kidney isoform, mitochondrial-like
106579180	leucine-rich repeat-containing protein 4B-like
106612705	BLVRB; flavin reductase (NADPH)-like
106573821	megakaryocyte-associated tyrosine-protein kinase-like
106568966	abhydrolase domain-containing protein 8-like
106586301	tyrosine-protein phosphatase non-receptor type 4-like
106601675	IgD; uncharacterized LOC106601675
106569371	uncharacterized LOC106569371
106563157	serine/threonine-protein kinase ULK1-like
106601818	hectd1; HECT domain E3 ubiquitin protein ligase 1
106564314	transmembrane channel-like protein 8
106590043	zinc finger E-box-binding homeobox 1-like
106566087	ccdc66; coiled-coil domain containing 66
100195143	rn128; E3 ubiquitin-protein ligase RNF128
106591538	uncharacterized LOC106591538
106572049	clstn1; calsyntenin 1
106591933	oxysterol-binding protein-related protein 3-like
106588935	ppp1r9a; protein phosphatase 1 regulatory subunit 9A
100195536	rnf10; ring finger protein 10
106560735	larp1; La ribonucleoprotein domain family member 1
106612465	serglycin-like
106583306	cytochrome P450 4B1-like
106604275	uncharacterized LOC106604275
100195746	cd37; Leukocyte antigen CD37
100136564	FRIH; ferritin heavy subunit
106568133	xpo7; exportin 7
106566375	TRAF3-interacting JNK-activating modulator-like
106582079	uncharacterized LOC106582079
106584017	TPOR; thrombopoietin receptor-like
106580437	dhx37; DEAH-box helicase 37
106567511	serine/threonine-protein kinase 10-like
106580528	leukocyte surface antigen CD53-like
106582786	inverted formin-2-like
106561857	annexin A2-like
106604483	clnk; cytokine dependent hematopoietic cell linker
100195353	fgl2; fibrinogen-like 2
106582720	uncharacterized LOC106582720
106576228	ankyrin repeat and SOCS box protein 13-like
106592338	uncharacterized LOC106592338
106611986	uncharacterized LOC106611986
106582397	GRAM domain-containing protein 1A-like
100286549	frih; Ferritin, heavy subunit
106562355	switch-associated protein 70-like
106569847	kynurenine--oxoglutarate transaminase 1-like
106567449	cytoplasmic polyadenylation element-binding protein 4-like
106571801	armc2; armadillo repeat containing 2
106565554	H1X; histone H1x
106568873	chromodomain-helicase-DNA-binding protein 7-like
106581184	synergin gamma-like
106613526	TGF-beta-activated kinase 1 and MAP3K7-binding protein 3-like
106601229	trinucleotide repeat-containing gene 6B protein-like
106587718	TSN3; tetraspanin-3-like
106563563	TGF-beta; transforming growth factor beta-1
106583129	CD2-associated protein-like
106574567	Ig kappa chain C region-like
106591759	atg2b; autophagy related 2B
106575163	E3 ubiquitin-protein ligase MARCH7-like
106579653	lethal(3)malignant brain tumor-like protein 4
106571564	TPM1; tropomyosin beta chain
106607751	map3k5; mitogen-activated protein kinase kinase kinase 5
106576966	calcium/calmodulin-dependent protein kinase type II subunit gamma-like
106580797	ssh2; slingshot protein phosphatase 2
100380739	inf2; inverted formin-2
106610284	PPM1K; protein phosphatase 1K, mitochondrial-like
106605082	WD and tetratricopeptide repeats protein 1-like
106588461	microtubule-actin cross-linking factor 1-like
106604320	zinc finger protein 711-like
100194717	eukaryotic peptide chain release factor subunit 1
106568315	E3 ubiquitin-protein ligase TRIM23
106566806	PH and SEC7 domain-containing protein 4-like
100195938	dcp2; decapping mRNA 2
106581800	cobll1; cordon-bleu WH2 repeat protein like 1
106565973	regulator of G-protein signaling 3-like
106589337	ubiquitin carboxyl-terminal hydrolase 22-like
106577894	uncharacterized LOC106577894
106607895	fasciculation and elongation protein zeta-2-like
100380773	sptan1; spectrin alpha, non-erythrocytic 1
106573812	klf2; Kruppel like factor 2
106574107	CDC42 small effector protein 1-like
106577935	ubiquitin carboxyl-terminal hydrolase CYLD-like
106560983	parvb; parvin beta
106566658	coiled-coil domain-containing protein 71-like
106573725	lin10; UPF0183 protein C16orf70 homolog
106563280	exportin-7-like
100194877	hax1; HCLS1 associated protein X-1
106612599	mitogen-activated protein kinase kinase kinase kinase 5-like
106570200	TXNIP; thioredoxin-interacting protein-like
106562201	adam10; ADAM metallopeptidase domain 10
106603203	lysine-specific demethylase 6B-like
106565324	guanine nucleotide exchange factor VAV2-like
100380758	bag5; BCL2 associated athanogene 5
106575202	CD99; CD99 antigen-like protein 2
100286449	fa49a; FAM49A
106610534	solute carrier family 43 member 3-like
106570194	SH22A; uncharacterized LOC106570194
106576199	DNA/RNA-binding protein KIN17-like
106561397	ornithine decarboxylase antizyme 2-like
106608563	RAS guanyl-releasing protein 2-like
106590486	SAT1; diamine acetyltransferase 1-like
106612653	rap1 GTPase-activating protein 2-like
106600983	tectonin beta-propeller repeat-containing protein 2-like
106585520	nuclear receptor corepressor 2-like
106573350	CD44 antigen-like
106578020	CAN1; calpain-1 catalytic subunit-like
106587342	disintegrin and metalloproteinase domain-containing protein 10-like
106560773	sorting nexin-1-like
106573769	COUP transcription factor 2-like
106582140	septin-7-like
100195153	ctsa; cathepsin A
106561988	cadherin-11-like
106601022	RAB5C; ras-related protein Rab-5C-like
100380660	frem1; FRAS1 related extracellular matrix 1
100195030	fbln4; fibulin 4
100195583	cbx3; Chromobox protein homolog 3
106585049	septin-2-like
106582735	RHOC; rho-related GTP-binding protein RhoC
106573601	midnolin-like
106605123	CA078; protein eva-1 homolog B-like
100380761	ltbp1; latent transforming growth factor beta binding protein 1
106573735	fam65a; family with sequence similarity 65 member A
106611592	sorting nexin-5-like
106599082	uncharacterized LOC106599082
106613823	rgl1; ral guanine nucleotide dissociation stimulator like 1
106586252	oxysterol-binding protein-related protein 6-like
106572357	uncharacterized protein KIAA1755-like
106564378	complement C1q tumor necrosis factor-related protein 1-like
106611874	macrophage colony-stimulating factor 1 receptor 1-like
106567969	clathrin heavy chain 1-like
106577202	cysteine-rich protein 3-like
106567044	serine/threonine-protein kinase receptor R3-like
106576214	USP6 N-terminal-like protein
106572541	uncharacterized LOC106572541
106580336	TCO2; transcobalamin-2-like
106581565	prcp; prolylcarboxypeptidase
106561907	src substrate cortactin-like
106573225	spondin-1-like
106578491	CNN3; calponin-3-like
106611360	CATB; cathepsin B-like
106604716	EGF-containing fibulin-like extracellular matrix protein 2
106571359	protein 4.1-like
106568866	EGFL7; epidermal growth factor-like protein 7
106584990	coronin-1C-like
100195461	marcs; Myristoylated alanine-rich C-kinase substrate
106567682	transcriptional regulator Erg-like
106576316	PRKC apoptosis WT1 regulator protein-like
106560785	wdr61; WD repeat domain 61
106583953	WW domain-containing transcription regulator protein 1-like
106581278	serpin H1-like
106607732	MARCS; myristoylated alanine-rich C-kinase substrate-like
106569916	semaphorin-6D-like
106560696	peak1; pseudopodium enriched atypical kinase 1
100196113	pdia1; disulfide-isomerase
106590226	ANX13; annexin A13-like
106604925	receptor expression-enhancing protein 2-like
106587272	B-cadherin-like
100196250	timp2; Metalloproteinase inhibitor 2
106580335	MARCKS-related protein-like
106608748	high affinity immunoglobulin epsilon receptor subunit gamma-like
106573456	thrombospondin type-1 domain-containing protein 4-like
106567100	ADA; adenosine deaminase-like
106560979	plexin-B2-like
106605143	CALM; calmodulin
100306848	dapk3; death-associated protein kinase 3
106566303	sarcoplasmic/endoplasmic reticulum calcium ATPase 2-like
106601584	fermitin family homolog 2
106611119	fermitin family homolog 2-like
106588291	C-type lectin domain family 4 member E-like
106567655	endothelial cell-selective adhesion molecule-like
106606259	T-cell leukemia homeobox protein 1-like
106609289	plexin-C1-like
106612545	angiopoietin-2-like
106609894	DNA-directed RNA polymerase II subunit 1-like
106587695	proprotein convertase subtilisin/kexin type 6-like
106579136	ptrf; polymerase I and transcript release factor
100136533	gdh2; glutamate dehydrogenase
106578677	arf-GAP with SH3 domain, ANK repeat and PH domain-containing protein 1-like
106606735	RAC1; ras-related C3 botulinum toxin substrate 1-like
106603706	fam168a; family with sequence similarity 168 member A
106567106	rab GDP dissociation inhibitor alpha
106582887	MAFB; transcription factor MafB-like
106606750	ER lumen protein-retaining receptor 2-like
106575232	zinc finger E-box-binding homeobox 2-like
106584705	SPI1; transcription factor PU.1-like
106582336	ETS translocation variant 5-like
106563312	atrial natriuretic peptide receptor 2-like
106585072	putative aminopeptidase W07G4.4
106574325	neuropilin-2-like
106604559	anxa5; annexin A5
106562983	inactive carboxypeptidase-like protein X2
106560914	septin-7-like
100306856	lgmn; legumain
106602708	zinc finger protein 36, C3H1 type-like 1
106568558	tek; TEK receptor tyrosine kinase
106576706	mmrn2; multimerin 2
106573699	PQLC1; PQ-loop repeat-containing protein 1-like
100380453	zn710; Zinc finger protein 710
106586829	calcitonin gene-related peptide type 1 receptor-like
100196753	i2b2b; Interferon regulatory factor 2-binding protein 2-B
106590313	prex2; phosphatidylinositol-3,4,5-trisphosphate dependent Rac exchange factor 2
106608595	PYGM; glycogen phosphorylase, muscle form
106571875	plexin-D1-like
106586256	disintegrin and metalloproteinase domain-containing protein 23-like
100194683	uncharacterized LOC100194683
106606431	metalloproteinase inhibitor 2-like
106576596	ATP-sensitive inward rectifier potassium channel 8-like
100380288	adgrl4; adhesion G protein-coupled receptor L4
106569899	uncharacterized LOC106569899
106577140	AT-rich interactive domain-containing protein 5B-like
106601274	neurogenic locus notch homolog protein 1-like
106568007	drebrin-like
106565529	rho guanine nucleotide exchange factor 25-like
106563609	arhgap31; Rho GTPase activating protein 31
106565982	hyaluronidase-1-like
106609461	nuclear receptor-interacting protein 2-like
106561388	tyrosine-protein kinase SgK223-like
100195370	catk; Cathepsin K
100194902	cebpa; CCAAT/enhancer binding protein (C/EBP), alpha
106601024	inactive phospholipase C-like protein 2
106613716	ras-related protein Rab-11B-like
106576870	cxcl12; C-X-C motif chemokine ligand 12
106610139	BAH and coiled-coil domain-containing protein 1-like
106575102	nrp2; neuropilin 2
106607201	neurogenic locus notch homolog protein 2-like
100196656	smyd1b; SET and MYND domain containing 1b
106599680	zinc finger protein 521-like
106612966	protein c-ets-1-B
106563924	phosphatidylinositol 3,4,5-trisphosphate 3-phosphatase TPTE2-like
106586211	D-3-phosphoglycerate dehydrogenase-like
106568364	dab2; DAB2, clathrin adaptor protein
106606173	TGF-beta receptor type-2-like
106577756	ephrin-B3-like
106586388	ETS translocation variant 5-like
106567272	syntaxin-binding protein 1
106610849	cytochrome P450 1B1-like
106573025	CD82 antigen-like
100196778	tpc1; Two pore calcium channel protein 1
106586133	nidogen-1-like
106564975	integrin alpha-X-like
106566625	plexin-D1-like
106602889	lhfp; lipoma HMGIC fusion partner
106600878	protein FAM171A2-like
100380566	fhl3; four and a half LIM domains 3
106572818	ski oncogene-like
106568364	dab2; DAB2, clathrin adaptor protein
106573119	caveolin-1-like
106607301	ST17A; serine/threonine-protein kinase 17A-like
106570047	angiopoietin-1-like
106560573	plvap; plasmalemma vesicle associated protein
106612564	multiple epidermal growth factor-like domains protein 6
106567125	pleckstrin homology domain-containing family G member 5-like
106577630	B-cell CLL/lymphoma 6 member B protein-like
106581770	CYBR1; cytochrome b reductase 1
106611851	protocadherin gamma-A12-like
100194810	npl; N-acetylneuraminate pyruvate lyase
106603011	EMILIN-1-like
106611783	pcdh18; protocadherin 18
100194955	asic1; acid sensing ion channel subunit 1
106577651	tumor necrosis factor ligand superfamily member 12-like
106601778	uncharacterized LOC106601778
106604437	protein ATP1B4-like
106606828	lipid phosphate phosphohydrolase 3-like
106565981	HYAL2; hyaluronidase-2-like
106605627	FXYD domain-containing ion transport regulator 6-like
100380403	st5; suppression of tumorigenicity 5
106566251	stabilin-1-like
106580866	cdc42 effector protein 2-like
106573567	fibrillin-2-like
106565857	coiled-coil domain-containing protein 3-like
100196889	pdli4; PDZ and LIM domain protein 4
106591868	probable N-acetyltransferase camello
100380803	cacb2; Voltage-dependent L-type calcium channel subunit beta-2
106579709	abl interactor 1-like
106563704	cytokine receptor common subunit gamma-like
106592820	LYAM3; E-selectin-like
106605227	protein C-ets-2-like
106576454	lumican-like
100195194	lyox; Protein-lysine 6-oxidase
106611597	ltc4s; leukotriene C4 synthase
100195240	tisd; Butyrate response factor 2
106569297	transcription factor SOX-4-like
106602138	protocadherin-18-like
106603713	unconventional myosin-VIIa-like
106567734	junctional adhesion molecule C-like
100846955	CYSP2; digestive cysteine proteinase 1
106602881	A disintegrin and metalloproteinase with thrombospondin motifs 15-like
106608007	akap12; A-kinase anchoring protein 12
106605730	complement C1s subcomponent-like
100380645	nr2f5; nuclear receptor subfamily 2 group F member 5
106591571	leucine-rich repeat-containing protein 17-like
106587483	leucine-rich repeat-containing G-protein coupled receptor 4-like
106561841	kif23; kinesin family member 23
106601461	meis2; Meis homeobox 2
106580619	selenoprotein Pa-like
106601087	UBA-like domain-containing protein 1
106571898	ror2; receptor tyrosine kinase like orphan receptor 2
106565463	nuclear receptor subfamily 1 group D member 1-like
106560648	P-selectin-like
106585260	phosphofurin acidic cluster sorting protein 2-like
106581922	gpm6b; glycoprotein M6B
106579209	rab11fip3; RAB11 family interacting protein 3
106609475	insulin-like growth factor I
106610423	C-type lectin domain family 4 member M-like
100380494	cr3l2; cAMP-responsive element-binding protein 3-like protein 2
106566214	semaphorin-3D-like
106571431	protein stum homolog
100306820	ppm1l; phosphatase 1L
106563624	endothelial cell-specific chemotaxis regulator-like
106582690	adenosine receptor A1-like
100195521	gp182; G-protein coupled receptor 182
106585817	pdlim5; PDZ and LIM domain 5
106601027	apoptosis-stimulating of p53 protein 1-like
100380462	vegfc; vascular endothelial growth factor c
106613816	nuclear receptor ROR-beta-like
106608581	complement component C1q receptor-like
106605301	uncharacterized LOC106605301
106589892	inward rectifier potassium channel 2-like
106580391	cmklr1; chemerin chemokine-like receptor 1
106565752	BHLH2; class E basic helix-loop-helix protein 40-like
106573484	zinc finger protein 710-like
106574089	transcription factor HES-1-like
106605669	mannan-binding lectin serine protease 2-like
106611011	uncharacterized LOC106611011
106561566	lymphatic vessel endothelial hyaluronic acid receptor 1-like
106580561	protein patched homolog 1-like
106602763	atrial natriuretic peptide receptor 1-like
106593515	placenta growth factor-like
106571616	leucine-rich repeat transmembrane protein FLRT2-like
100380445	dhrs3; Short-chain dehydrogenase/reductase 3
106611383	thrombomodulin-like
106579892	pre-B-cell leukemia transcription factor 3-like
106605556	TLR; toll-like receptor 13
106582808	ski oncogene-like
100194824	i2b2a; Interferon regulatory factor 2-binding protein 2-A
106575647	filamin A-interacting protein 1-like
106609037	lumican-like
106606354	uncharacterized LOC106606354
106563686	malignant fibrous histiocytoma-amplified sequence 1 homolog
106570718	tissue alpha-L-fucosidase-like
106585026	serine/threonine-protein kinase PLK2-like
106567077	GP182; G-protein coupled receptor 182-like
106580448	alpha-2B adrenergic receptor-like
106592193	oit3; oncoprotein induced transcript 3
106580150	nuclear receptor subfamily 2 group F member 1-A-like
106596897	collagen alpha-1(XI) chain-like
106607642	creatine kinase B-type-like
100136517	insulin-like growth factor I
106582008	filamin A-interacting protein 1-like
106591673	T-cell ecto-ADP-ribosyltransferase 2-like
106590133	mrc1; mannose receptor C-type 1
106577374	BCL2/adenovirus E1B 19 kDa protein-interacting protein 3-like
106561514	notch-regulated ankyrin repeat-containing protein A
106597086	anion exchange protein 2-like
106611144	neurexin-1-beta-like
106577884	schwannomin-interacting protein 1-like
106581893	protein-lysine methyltransferase METTL21C-like
106575613	collagen alpha-1(XVIII) chain-like
106582403	RND3; rho-related GTP-binding protein RhoE-like
106580403	serine/threonine-protein kinase PLK2-like
106568251	uncharacterized LOC106568251
100196222	xlkd1; Lymphatic vessel endothelial hyaluronic acid receptor 1
106610080	zinc finger and BTB domain-containing protein 16-like
106608597	EPD; ependymin-like
106581048	septin-4-like
106568993	GIMA7; GTPase IMAP family member 7-like
106578397	claudin-11-like
106573096	anoctamin-1-like
106578029	GTPase IMAP family member 7-like
106577060	prolyl 4-hydroxylase subunit alpha-1-like
100195631	kcne4; potassium voltage-gated channel, Isk-related family, member 4
106601118	MICAL-like protein 2
106566468	DNSL3; deoxyribonuclease gamma-like
106561616	anoctamin-1-like
106585343	alpha-1A adrenergic receptor-like
106583235	cytochrome P450 1B1 pseudogene
100195654	kcrt; Creatine kinase, testis isozyme
106577143	transmembrane protein 26-like
106578980	protein phosphatase 1 regulatory subunit 3C-B-like
100194744	co7; Complement component C7
106567182	general receptor for phosphoinositides 1-associated scaffold protein-like
106604911	rho GTPase-activating protein 24-like
106605192	zinc finger protein 36, C3H1 type-like 2-A
106609550	angiopoietin-related protein 5-like
106581204	nectin-3-like protein
106608164	zinc finger protein 36, C3H1 type-like 1
106567268	neurofascin-like
106569878	atrial natriuretic peptide receptor 1-like
106607607	protein NDNF-like
100380678	stab2; stabilin 2
106569877	RSLBB; ras-related and estrogen-regulated growth inhibitor-like protein
106605133	four and a half LIM domains protein 3-like
106566620	uncharacterized LOC106566620
106568231	gamma-glutamyltransferase 5-like
106609709	complement C1q-like protein 2
106601356	uncharacterized LOC106601356
106561493	neuron navigator 2-like
106575072	CDN1B; cyclin-dependent kinase inhibitor 1B-like
106611552	LIM domain-binding protein 2
106611226	egl nine homolog 3-like
106590136	collectin-12-like
106613704	C-C motif chemokine 25-like
106611226	egl nine homolog 3-like
106585075	alpha-2B adrenergic receptor-like
106564485	transmembrane protein 119-like
106605385	integrin alpha-8-like
106596680	membrane-spanning 4-domains subfamily A member 4D-like
106570201	thrombospondin-3b-like
106588186	uncharacterized LOC106588186
106577531	basal cell adhesion molecule-like
106608548	CCL4; C-C motif chemokine 4-like
106569199	glutamine synthetase-like
106569695	natural killer cell receptor 2B4-like
106560919	protein NDRG4-like
106578794	C-X-C chemokine receptor type 3-like
106570153	Ig kappa chain V-III region NG9-like
106602775	leucine-rich repeats and immunoglobulin-like domains protein 1
106613588	sphingosine 1-phosphate receptor 1
106613126	potassium voltage-gated channel subfamily E member 4-like
106598333	GTPase IMAP family member 8-like

## Sheet: ICJ | FM
Id	Description
106577132	protein phosphatase 1 regulatory subunit 3C-B-like		Upregulated
106570153	Ig kappa chain V-III region NG9-like		Downregulated
100195654	kcrt; Creatine kinase, testis isozyme
100194616	cf12; cofilin 2
106607607	protein NDNF-like
106576150	transcription factor SOX-5-like
106607642	creatine kinase B-type-like
106568231	gamma-glutamyltransferase 5-like
106608597	EPD; ependymin-like
106563704	cytokine receptor common subunit gamma-like
106570718	tissue alpha-L-fucosidase-like
106587272	B-cadherin-like
106573096	anoctamin-1-like
106570833	titin-like
106582465	sialic acid-binding Ig-like lectin 5
106611874	macrophage colony-stimulating factor 1 receptor 1-like
106610849	cytochrome P450 1B1-like
100380453	zn710; Zinc finger protein 710
106590133	mrc1; mannose receptor C-type 1
100846955	CYSP2; digestive cysteine proteinase 1
106567969	clathrin heavy chain 1-like
106564951	protein AF-17-like
106585690	vps13a; vacuolar protein sorting 13 homolog A
106601354	uncharacterized LOC106601354
106572882	thymic stromal cotransporter homolog
106577506	apolipoprotein Eb-like
106560601	uncharacterized LOC106560601
106601674	serine/threonine-protein kinase 19-like

## Sheet: ICJ | SBM
Id	Description
106567727	zinc finger and BTB domain-containing protein 16-A-like		Upregulated
106603639	zinc finger and BTB domain-containing protein 16-A		Downregulated
106582240	GBP1; interferon-induced guanylate-binding protein 1-like
106566120	shmt2; serine hydroxymethyltransferase 2
106606431	metalloproteinase inhibitor 2-like
100380654	postn; periostin
106598516	RGS5; regulator of G-protein signaling 5-like
106590282	collagen alpha-1(XVIII) chain-like
106577513	endosialin-like
106587131	uncharacterized LOC106587131
106601584	fermitin family homolog 2
106607946	serine protease 23-like
106565463	nuclear receptor subfamily 1 group D member 1-like
106588942	TFPI2; tissue factor pathway inhibitor 2-like
106605773	hepatic leukemia factor-like
106596897	collagen alpha-1(XI) chain-like
106588186	uncharacterized LOC106588186
106585075	alpha-2B adrenergic receptor-like
106581048	septin-4-like
106603540	protein Wnt-11-like
106609550	angiopoietin-related protein 5-like
106602775	leucine-rich repeats and immunoglobulin-like domains protein 1
106592568	60S ribosomal protein L27
106566201	60S ribosomal protein L32-like
106595586	Ig gamma-2C chain C region-like

## Sheet: ACJ | FM
Id	Description
106600929	sptbn5; spectrin beta, non-erythrocytic 5		Upregulated
100195654	kcrt; Creatine kinase, testis isozyme		Downregulated
106613704	C-C motif chemokine 25-like
106610851	inverted formin-2-like
106610626	echinoderm microtubule-associated protein-like 1
106608548	CCL4; C-C motif chemokine 4-like
106599874	protein Wnt-9a-like
106579692	probable polyketide synthase 1
106578605	insulin-induced gene 1 protein-like
106573180	transmembrane and TPR repeat-containing protein 2-like
106570689	MARCKS-related protein-like
106570201	thrombospondin-3b-like
106569695	natural killer cell receptor 2B4-like
106567957	coxsackievirus and adenovirus receptor homolog
106607607	protein NDNF-like
106605327	leucine-rich repeat and immunoglobulin-like domain-containing nogo receptor-interacting protein 1
106576808	brorin-like
106566468	DNSL3; deoxyribonuclease gamma-like
106607642	creatine kinase B-type-like
106589684	G-protein coupled receptor 4-like
106602775	leucine-rich repeats and immunoglobulin-like domains protein 1
106568231	gamma-glutamyltransferase 5-like
100194616	cf12; cofilin 2
106575613	collagen alpha-1(XVIII) chain-like
106569297	transcription factor SOX-4-like
106596897	collagen alpha-1(XI) chain-like
106600431	GREB1-like protein
106604467	sodium bicarbonate transporter-like protein 11
106574411	rho GTPase-activating protein 6-like
106590108	insig1; insulin induced gene 1
106582008	filamin A-interacting protein 1-like
106572982	tafazzin-like
106590529	lipocalin-like
106611552	LIM domain-binding protein 2
100136429	vtgr; very low-density lipoprotein receptor
106587985	NAD(P)H dehydrogenase [quinone] 1-like
106565102	epiphycan-like
106567268	neurofascin-like
106592595	OCAD1; OCIA domain-containing protein 1-like
106588402	Sasa-UBA; major histocompatibility complex class I-related gene protein-like
106585113	zinc finger protein 703-like
106573096	anoctamin-1-like
106573484	zinc finger protein 710-like
106590359	heparan-sulfate 6-O-sulfotransferase 1-B-like
106601093	MKL/myocardin-like protein 2
106593840	bifunctional endo-1,4-beta-xylanase XylA-like
106581934	protein FAM171B-like
106566620	uncharacterized LOC106566620
106602284	npnt; nephronectin
106569199	glutamine synthetase-like
106575567	tensin-like
106604461	multidrug resistance-associated protein 5-like
106577060	prolyl 4-hydroxylase subunit alpha-1-like
106570153	Ig kappa chain V-III region NG9-like
106581893	protein-lysine methyltransferase METTL21C-like
106581433	pentraxin-related protein PTX3-like
106607840	uncharacterized LOC106607840
106569899	uncharacterized LOC106569899
100195042	ybx2a; Y-box-binding protein 2-A
106563119	dual specificity testis-specific protein kinase 2-like
106601618	tumor necrosis factor receptor superfamily member 16-like
106571431	protein stum homolog
106572749	tensin-2-like
106567983	ubb; ubiquitin B
106568251	uncharacterized LOC106568251
106579709	abl interactor 1-like
106570066	N(G),N(G)-dimethylarginine dimethylaminohydrolase 2-like
106573642	ccdc113; coiled-coil domain containing 113
100194744	co7; Complement component C7
106579212	uncharacterized LOC106579212
106583528	receptor-type tyrosine-protein phosphatase gamma-like
100136517	insulin-like growth factor I
106585817	pdlim5; PDZ and LIM domain 5
106581922	gpm6b; glycoprotein M6B
100195082	zn503; Zinc finger protein 503
106585132	lysyl oxidase homolog 2B-like
106601027	apoptosis-stimulating of p53 protein 1-like
100380678	stab2; stabilin 2
100846955	CYSP2; digestive cysteine proteinase 1
106581770	CYBR1; cytochrome b reductase 1
106562306	spondin-1-like
106567125	pleckstrin homology domain-containing family G member 5-like
106601140	unconventional myosin-X-like
106563193	vitamin K-dependent gamma-carboxylase-like
100196222	xlkd1; Lymphatic vessel endothelial hyaluronic acid receptor 1
106601778	uncharacterized LOC106601778
106591349	tensin-like
106604559	anxa5; annexin A5
106577630	B-cell CLL/lymphoma 6 member B protein-like
106611597	ltc4s; leukotriene C4 synthase
106588773	methyltransferase-like protein 24
106563704	cytokine receptor common subunit gamma-like
106581666	collagen alpha-3(VI) chain-like
106597294	collagen alpha-1(VI) chain-like
106612914	mfsd1; major facilitator superfamily domain containing 1
100196656	smyd1b; SET and MYND domain containing 1b
106568364	dab2; DAB2, clathrin adaptor protein
100194810	npl; N-acetylneuraminate pyruvate lyase
106592791	lysosome-associated membrane glycoprotein 1-like
106594538	collagen alpha-2(VI) chain-like
100194861	lpp60; 60 kDa lysophospholipase
106608576	ankyrin-2-like
106567840	unconventional myosin-Ic-like
106580995	T-box transcription factor TBX2b-like
100306775	rcan2; regulator of calcineurin 2
100195370	catk; Cathepsin K
106590133	mrc1; mannose receptor C-type 1
106562198	cgnl1; cingulin like 1
106563924	phosphatidylinositol 3,4,5-trisphosphate 3-phosphatase TPTE2-like
106570833	titin-like
100380288	adgrl4; adhesion G protein-coupled receptor L4
100306856	lgmn; legumain
106561566	lymphatic vessel endothelial hyaluronic acid receptor 1-like
106586388	ETS translocation variant 5-like
106587244	tight junction protein ZO-1-like
100306835	lamp1; lysosomal-associated membrane protein 1
106611851	protocadherin gamma-A12-like
106609289	plexin-C1-like
106608597	EPD; ependymin-like
106572541	uncharacterized LOC106572541
106563272	regulator of G-protein signaling 3-like
106610672	platelet-activating factor receptor-like
106592569	GRN; granulins-like
106607201	neurogenic locus notch homolog protein 2-like
106590226	ANX13; annexin A13-like
106566625	plexin-D1-like
106568364	dab2; DAB2, clathrin adaptor protein
106579241	uncharacterized LOC106579241
106579136	ptrf; polymerase I and transcript release factor
106576681	H2AW; core histone macro-H2A.2-like
106569916	semaphorin-6D-like
106568007	drebrin-like
106590474	VATA; V-type proton ATPase catalytic subunit A
100380458	cnpy4; canopy FGF signaling regulator 4
100196778	tpc1; Two pore calcium channel protein 1
106583918	ras-related protein R-Ras-like
106567682	transcriptional regulator Erg-like
106578526	mmp16; matrix metallopeptidase 16
106573025	CD82 antigen-like
106601425	ras-related protein Rab-37-like
100196250	timp2; Metalloproteinase inhibitor 2
106604437	protein ATP1B4-like
100196113	pdia1; disulfide-isomerase
106611184	daam1; dishevelled associated activator of morphogenesis 1
106610723	disintegrin and metalloproteinase domain-containing protein 17-like
106584990	coronin-1C-like
106587272	B-cadherin-like
100380798	aldoa; fructose-bisphosphate aldolase A
106606431	metalloproteinase inhibitor 2-like
106568739	PROF2; profilin-2-like
106568830	ATP-dependent 6-phosphofructokinase, platelet type-like
106580336	TCO2; transcobalamin-2-like
106587025	2-oxoglutarate dehydrogenase, mitochondrial
106580335	MARCKS-related protein-like
106609887	CLCA; clathrin light chain A-like
106567969	clathrin heavy chain 1-like
106573769	COUP transcription factor 2-like
106583908	fructose-bisphosphate aldolase A-like
106560773	sorting nexin-1-like
106613685	CALR; calreticulin-like
106577739	G3P; glyceraldehyde-3-phosphate dehydrogenase
106588090	GDIR; rho GDP-dissociation inhibitor 1-like
106580904	induced myeloid leukemia cell differentiation protein Mcl-1 homolog
100380773	sptan1; spectrin alpha, non-erythrocytic 1
106592338	uncharacterized LOC106592338
100196732	sbno1; strawberry notch homolog 1
106575202	CD99; CD99 antigen-like protein 2
106567288	high mobility group protein HMG-I/HMG-Y-like
106562201	adam10; ADAM metallopeptidase domain 10
106573028	tyrosine-protein kinase CSK-like
106589843	probable E3 ubiquitin-protein ligase TRIM8
106589738	foxn2; forkhead box N2
106561316	PHD and RING finger domain-containing protein 1-like
106613686	KLF2; Krueppel-like factor 2
106580416	ras GTPase-activating-like protein IQGAP1
106585005	pleckstrin homology domain-containing family A member 2-like
106583923	U1 small nuclear ribonucleoprotein 70 kDa-like
106566613	SUSD3; uncharacterized LOC106566613
100195196	ebi2; EBV-induced G-protein coupled receptor 2
106573623	A-kinase anchor protein 13-like
106579638	guanine nucleotide-binding protein G(olf) subunit alpha-like
106561037	ceramide kinase-like
100195353	fgl2; fibrinogen-like 2
106609315	DENN domain-containing protein 5B-like
106562913	H2AV; histone H2A.V
106560592	hps3; HPS3, biogenesis of lysosomal organelles complex 2 subunit 1
106584539	uncharacterized LOC106584539
106566589	lime1; Lck interacting transmembrane adaptor 1
106575497	atp8b2; ATPase phospholipid transporting 8B2
106564952	zinc finger protein Aiolos-like
106588821	fam65b; family with sequence similarity 65 member B
106587550	switch-associated protein 70-like
100195406	grap2; GRB2-related adaptor protein 2
106582137	ANR10; ankyrin repeat domain-containing protein 10-like
106567410	sarcoplasmic/endoplasmic reticulum calcium ATPase 1-like
106611986	uncharacterized LOC106611986
106579125	cd79b; CD79b molecule
100196542	dapp1; dual adaptor of phosphotyrosine and 3-phosphoinositides 1
106600872	microtubule-associated protein tau-like
106565324	guanine nucleotide exchange factor VAV2-like
106613442	prkacb; protein kinase cAMP-activated catalytic subunit beta
106563851	sister chromatid cohesion protein PDS5 homolog B-like
106568827	protein phosphatase 1 regulatory subunit 26-like
106576228	ankyrin repeat and SOCS box protein 13-like
106586498	rubcnl; RUN and cysteine rich domain containing beclin 1 interacting protein like
106576789	B-cell linker protein-like
106575215	glutaminase kidney isoform, mitochondrial-like
106584104	protein furry homolog-like
106573812	klf2; Kruppel like factor 2
106580797	ssh2; slingshot protein phosphatase 2
106574018	single-stranded DNA-binding protein 3-like
106603118	spectrin beta chain, non-erythrocytic 1-like
106605964	phospholipid-transporting ATPase ID-like
106589337	ubiquitin carboxyl-terminal hydrolase 22-like
106583129	CD2-associated protein-like
106566375	TRAF3-interacting JNK-activating modulator-like
106577759	mitogen-activated protein kinase kinase kinase kinase 5-like
106612599	mitogen-activated protein kinase kinase kinase kinase 5-like
106591933	oxysterol-binding protein-related protein 3-like
106587207	semaphorin-7A-like
106576393	ETS domain-containing transcription factor ERF-like
106588723	uncharacterized LOC106588723
100195746	cd37; Leukocyte antigen CD37
106566120	shmt2; serine hydroxymethyltransferase 2
106574333	junctional adhesion molecule B-like
106561486	jak2; Janus kinase 2
106611750	uncharacterized LOC106611750
106583306	cytochrome P450 4B1-like
106572092	inositol 1,4,5-trisphosphate receptor type 3-like
106573309	inositol 1,4,5-trisphosphate receptor type 2-like
106608817	gigyf1; GRB10 interacting GYF protein 1
106612474	mcam; melanoma cell adhesion molecule
106564951	protein AF-17-like
106575432	Ig lambda-1 chain C region-like
106606374	immunoglobulin lambda-like polypeptide 1
106596996	activated CDC42 kinase 1-like
106583139	transcription factor EB-like
106582746	leiomodin-1-like
106586768	st6gal2; ST6 beta-galactoside alpha-2,6-sialyltransferase 2
106603289	oligodendrocyte-myelin glycoprotein-like
106590324	T-cell acute lymphocytic leukemia protein 1-like
106579087	protein FAM117A-like
106612112	serine/threonine-protein phosphatase 2B catalytic subunit alpha isoform-like
106574569	Ig kappa chain C region-like
106588971	zinc finger protein DPF3-like
106590043	zinc finger E-box-binding homeobox 1-like
106591897	uncharacterized LOC106591897
106598552	b3galt2; beta-1,3-galactosyltransferase 2
106604905	zinc finger protein 518A-like
106563192	proactivator polypeptide-like
106587944	very-long-chain (3R)-3-hydroxyacyl-CoA dehydratase-like
106585658	acetyl-CoA carboxylase 2-like
106564583	B-cell lymphoma/leukemia 11A pseudogene
100195046	pou2af1; POU class 2 associating factor 1
106562355	switch-associated protein 70-like
106604247	wdfy4; WDFY family member 4
106583621	serine/threonine-protein kinase 35-like
106572153	alas2; 5'-aminolevulinate synthase 2
100136511	CCL4-like chemokine
106602950	NHS-like protein 2
100306867	cb055; CB055 protein
106581247	unconventional myosin-XVIIIa-like
106571215	NACHT, LRR and PYD domains-containing protein 12-like
106584897	calcium/calmodulin-dependent protein kinase type II subunit beta
106565041	fam65c; family with sequence similarity 65 member C
106571801	armc2; armadillo repeat containing 2
106571195	ammonium transporter Rh type A-like
106590038	T-cell acute lymphocytic leukemia protein 1 homolog
100195152	tal1; T-cell acute lymphocytic leukemia 1
106582844	band 4.1-like protein 1
106608989	SLAM family member 9-like
100194738	gata1; GATA-binding factor 1
106591538	uncharacterized LOC106591538
106591759	atg2b; autophagy related 2B
100194690	cssa17h12orf56; chromosome ssa17 open reading frame, human C12orf56
106585516	E3 ubiquitin-protein ligase DTX1-like
100196543	s29a1; equilibrative nucleoside transporter 1
106606136	src-like-adapter
106582237	GBP1; interferon-induced guanylate-binding protein 1-like
106590401	brefeldin A-inhibited guanine nucleotide-exchange protein 1-like
106579515	protein shisa-2-like
106592132	trinucleotide repeat-containing gene 6A protein-like
106582456	B-cell receptor CD22-like
106580625	ATP-binding cassette sub-family A member 2-like
106611774	alpha-1,3-mannosyl-glycoprotein 4-beta-N-acetylglucosaminyltransferase B-like
106584140	serine/threonine-protein kinase Kist-like
106564366	transmembrane channel-like protein 6
106570195	death-associated protein kinase 2-like
106593098	transmembrane channel-like protein 6
106577592	protein AF-9-like
106592550	CD97 antigen-like
106578366	zinc finger protein 518A-like
106580500	phosphatidate cytidylyltransferase 2-like
106613168	methylcytosine dioxygenase TET2-like
106562940	fcho2; FCH domain only 2
106610657	rho GTPase-activating protein 27-like
106584123	clock; clock circadian regulator
106569123	uncharacterized LOC106569123
106582916	RB24B; RNA-binding protein 38-like
106578744	lysosomal-trafficking regulator-like
106587409	lysozyme g-like
106578023	uncharacterized LOC106578023
106574609	probable phospholipid-transporting ATPase IH
106602957	cationic amino acid transporter 3-like
106570315	adseverin-like
106579160	probable phosphatase phospho1
106612809	uncharacterized LOC106612809
106588768	sestrin-1-like
106578893	uncharacterized protein KIAA0195-like
106596416	ZZ-type zinc finger-containing protein 3-like
106567650	interleukin-31 receptor subunit alpha-like
106605689	apolipoprotein Eb-like
106600939	uncharacterized LOC106600939
106561185	uncharacterized LOC106561185
106580750	rhbg; Rh family B glycoprotein
106560701	prr5l; proline rich 5 like
106596109	protein 4.1-like
106589687	zbtb18; zinc finger and BTB domain containing 18
106576023	proline and serine-rich protein 2-like
100286485	ccd50; Coiled-coil domain-containing protein 50
106567181	diacylglycerol kinase alpha-like
106574567	Ig kappa chain C region-like
106580294	pleckstrin homology domain-containing family A member 2-like
106579329	thyroid hormone receptor alpha-like
106565457	zinc finger protein Gfi-1b-like
106586681	xk; X-linked Kx blood group
100499263	selja; selenoprotein Ja
100306838	addb; Beta-adducin
106601234	uncharacterized LOC106601234
106598722	protein phosphatase 1A
100380560	atf5; Cyclic AMP-dependent transcription factor ATF-5
106589462	narf; nuclear prelamin A recognition factor
106574152	thromboxane A2 receptor-like
106589451	uncharacterized protein KIAA0195-like
100195549	ctbs; chitobiase
106575499	sodium/myo-inositol cotransporter-like
106566796	protein SOGA1-like
106588242	probable ATP-dependent RNA helicase ddx6
106579751	procollagen-lysine,2-oxoglutarate 5-dioxygenase 2-like
106564305	lipopolysaccharide-induced tumor necrosis factor-alpha factor homolog
106577800	tripartite motif-containing protein 34A-like
100195306	chac1; ChaC, cation transport regulator-like 1
106566830	sodium-coupled neutral amino acid transporter 3-like
106574405	ras-related protein Rab-9A-like
106606079	protein 4.1-like
106579933	gamma-glutamyltranspeptidase 1-like
106569126	zinc finger protein SNAI2-like
106563430	serine/threonine-protein kinase PAK 3
106592852	uncharacterized LOC106592852
106590674	peptidase inhibitor 15-A-like
106613678	megakaryocyte-associated tyrosine-protein kinase-like
106577368	slc1a4; solute carrier family 1 member 4
106580935	uncharacterized LOC106580935
106613235	F-BAR and double SH3 domains protein 2-like
106612759	glycerophosphodiester phosphodiesterase domain-containing protein 5-like
106608512	hypoxia-inducible factor 1-alpha inhibitor-like
106601258	serine/threonine-protein kinase WNK4-like
106576235	ADM2-like
106573635	large neutral amino acids transporter small subunit 1-like
106607157	uncharacterized LOC106607157
100286470	ecop; EGFR-coamplified and overexpressed protein
106566239	adhesion G protein-coupled receptor E1-like
106563020	TNF receptor-associated factor 2-like
106587037	nudt12; nudix hydrolase 12
106578229	zinc finger protein 79-like
106564529	zinc finger protein 120-like
106613395	C-X-C chemokine receptor type 5-like
106579829	ggt2; gamma-glutamyltransferase 2
106607112	HBB1; hemoglobin subunit beta-1
106591653	uncharacterized LOC106591653
106580346	METK2; S-adenosylmethionine synthase isoform type-2-like
106601824	PRVU; parvalbumin, thymic CPV3-like
106562888	neutral amino acid transporter A-like
106581541	high affinity cationic amino acid transporter 1-like
106609361	ADM2-like
106591384	plasma membrane calcium-transporting ATPase 3-like
106607180	serine/threonine-protein kinase WNK4-like
106572152	N-terminal EF-hand calcium-binding protein 1-like
106592009	Fc receptor-like protein 5
106568905	glycogen debranching enzyme-like
106606485	CP014; protein FAM195A-like
106604951	histone-lysine N-methyltransferase 2D-like
106601354	uncharacterized LOC106601354
106604036	B-cell receptor CD22-like
106572807	tumor necrosis factor receptor superfamily member 5-like
106576903	Ig gamma-2 chain C region-like
106601717	Ig mu chain C region membrane-bound form-like
106601362	EPOR; erythropoietin receptor-like
106603540	protein Wnt-11-like
106568655	erythroferrone-like
106568922	lrrcc1; leucine rich repeat and coiled-coil centrosomal protein 1
100306751	ddt4l; DNA-damage-inducible transcript 4-like protein

## Sheet: ACJ | SBM
Id	Description
106569843	BOLA class I histocompatibility antigen, alpha chain BL3-7-like		Upregulated
106589836	cytohesin-1-like		Downregulated
106593678	cystathionine beta-synthase-like
106563740	uncharacterized LOC106563740
106589295	neuronal-specific septin-3-like
100136509	tumor necrosis factor alpha
106567727	zinc finger and BTB domain-containing protein 16-A-like
106572737	mitogen-activated protein kinase 14A-like
106599167	putative golgin subfamily A member 6-like protein 6
106582017	uncharacterized LOC106582017
106577511	apolipoprotein C-I-like
106562007	BNIP3; BCL2/adenovirus E1B 19 kDa protein-interacting protein 3-like
106601647	band 3 anion exchange protein-like
106595182	trichohyalin-like
106597324	trichohyalin-like
106574039	T-cell acute lymphocytic leukemia protein 1 homolog
106597201	trichohyalin-like
106612328	golgin subfamily A member 6-like protein 22
100286657	tssp; Thymus-specific serine protease
106601051	HBB; hemoglobin subunit beta-like
106590143	phosphatidate phosphatase LPIN2-like
106561570	sardh; sarcosine dehydrogenase
106570020	trichohyalin-like
106601076	HBA4; hemoglobin subunit alpha-4
106570025	trichohyalin-like
100286544	nmes1; Normal mucosa of esophagus-specific gene 1 protein
106573646	SNF-related serine/threonine-protein kinase-like
100196543	s29a1; equilibrative nucleoside transporter 1
106601072	hemoglobin subunit alpha
106607375	HBA4; hemoglobin subunit alpha-4
106607371	hemoglobin subunit beta-1-like
106579276	pdzd7; PDZ domain containing 7
106575861	kell blood group glycoprotein-like
106580352	MTDC; bifunctional methylenetetrahydrofolate dehydrogenase/cyclohydrolase, mitochondrial-like
106595653	trichohyalin-like
106606869	band 3 anion exchange protein-like
106607372	HBB; hemoglobin subunit beta-like
100136576	hbb; beta globin
106606856	band 3 anion exchange protein-like
100196390	saca4; Sperm acrosome membrane-associated protein 4
100196094	catc; dipeptidyl peptidase 1
100380859	b3at; band 3 anion exchange protein
106573055	AMPM2; methionine aminopeptidase 2-like
100380571	npdc1; neural proliferation, differentiation and control, 1
106607373	HBA; hemoglobin subunit alpha-like
106601078	HBA; hemoglobin subunit alpha-like
106585113	zinc finger protein 703-like
106571138	protein phosphatase 1 regulatory subunit 14B-like
106566560	tp53inp2; tumor protein p53 inducible nuclear protein 2
106561364	Krueppel-like factor 4
106579861	slc25a37; solute carrier family 25 member 37
106586175	catalase-like
106560515	TPOR; thrombopoietin receptor-like
100195268	cahz; carbonic anhydrase
100194970	ctgf; connective tissue growth factor
106591205	ectonucleoside triphosphate diphosphohydrolase 7-like
106592210	WW domain-binding protein 4-like
106575220	uncharacterized LOC106575220
106599441	ckb; creatine kinase B
106600435	AQPA; aquaporin FA-CHIP-like
106561703	hbp1; HMG-box transcription factor 1
106561857	annexin A2-like
106591349	tensin-like
106571195	ammonium transporter Rh type A-like
106578515	coiled-coil domain-containing protein 129-like
106575567	tensin-like
106590333	RING finger protein 11-like
106602333	hemogen-like
100194509	tmod4; tropomodulin 4 (muscle)
106580524	tumor necrosis factor receptor superfamily member 10B-like
106605617	amyloid-like protein 1
100380360	f13a; Coagulation factor XIII A chain
106590608	methionine synthase reductase-like
106566776	HYAL2; hyaluronidase-3-like
100195794	prdx1; peroxiredoxin 1
106579149	integrin beta-3-like
106568712	ADP-dependent glucokinase-like
106566470	ID1; DNA-binding protein inhibitor ID-1-like
106613552	SUN domain-containing protein 2-like
106571123	IF5; eukaryotic translation initiation factor 5-like
106582786	inverted formin-2-like
106577998	protein NDRG2-like
100194738	gata1; GATA-binding factor 1
106566372	glutathione S-transferase Mu 3-like
106613077	nlk; nemo like kinase
106589946	nuclear factor 1 X-type-like
106573821	megakaryocyte-associated tyrosine-protein kinase-like
106612465	serglycin-like
106580165	ARRD3; arrestin domain-containing protein 3
106580437	dhx37; DEAH-box helicase 37
106601818	hectd1; HECT domain E3 ubiquitin protein ligase 1
106566296	pancreatic progenitor cell differentiation and proliferation factor B-like
106613411	herc2; HECT and RLD domain containing E3 ubiquitin protein ligase 2
100136564	FRIH; ferritin heavy subunit
106562044	MTSS1-like protein
106599082	uncharacterized LOC106599082
100194543	hmgb1; high-mobility group box 1
106567410	sarcoplasmic/endoplasmic reticulum calcium ATPase 1-like
106576214	USP6 N-terminal-like protein
106561988	cadherin-11-like
106608597	EPD; ependymin-like
106563018	phosphatidylinositol 3-kinase regulatory subunit alpha-like
106582887	MAFB; transcription factor MafB-like
106587131	uncharacterized LOC106587131
106598516	RGS5; regulator of G-protein signaling 5-like
106579209	rab11fip3; RAB11 family interacting protein 3
106580556	dedicator of cytokinesis protein 8-like
106567018	SLIT-ROBO Rho GTPase-activating protein 3-like
106566976	plexin-B1-like
106586230	neurabin-1-like
106575232	zinc finger E-box-binding homeobox 2-like
100380464	klc1; kinesin light chain 1
106592193	oit3; oncoprotein induced transcript 3
106580150	nuclear receptor subfamily 2 group F member 1-A-like
100194774	pdli2; PDZ and LIM domain protein 2
106585075	alpha-2B adrenergic receptor-like
106589352	MMS19 nucleotide excision repair protein homolog
106560463	pde4b; phosphodiesterase 4B
106610817	runt-related transcription factor 3-like
106576235	ADM2-like
106567182	general receptor for phosphoinositides 1-associated scaffold protein-like
106563686	malignant fibrous histiocytoma-amplified sequence 1 homolog
100380762	amfr2; E3 ubiquitin-protein ligase AMFR
106607301	ST17A; serine/threonine-protein kinase 17A-like
106581167	hypermethylated in cancer 1 protein-like
106585156	dedicator of cytokinesis protein 8-like
106578443	chondrolectin-like
106578893	uncharacterized protein KIAA0195-like
100195489	ccr9; C-C chemokine receptor type 9
106587288	cadherin-11-like
106570356	SGK1; serine/threonine-protein kinase Sgk1-like
106608164	zinc finger protein 36, C3H1 type-like 1
106584368	MAP kinase-interacting serine/threonine-protein kinase 2-like
106599802	cebpd; CCAAT/enhancer binding protein delta
106607252	ADP-ribosylation factor-like protein 5B
106567181	diacylglycerol kinase alpha-like
106611226	egl nine homolog 3-like
106613039	hypermethylated in cancer 1 protein-like
106581048	septin-4-like
106612585	uncharacterized LOC106612585
100306754	cxcr4; C-X-C chemokine receptor type 4
106612759	glycerophosphodiester phosphodiesterase domain-containing protein 5-like
106603540	protein Wnt-11-like
106592479	DNA damage-inducible transcript 4 protein-like
106577395	DNA damage-inducible transcript 4 protein-like
106599079	uncharacterized LOC10659907

## Sheet: ACJ | ICJ
Id	Description
106596897	collagen alpha-1(XI) chain-like		Upregulated
106581934	protein FAM171B-like		Downregulated
100380654	postn; periostin
106567195	uncharacterized LOC106567195
106572807	tumor necrosis factor receptor superfamily member 5-like
106582912	cadherin-4-like
106583653	E3 ubiquitin-protein ligase RNF213-like
